# Supplementary material
Source: PubMed Central journal article supplement (PMC7437663)
Supplement: NIHPP2020.04.22.056127-supplement-1.pdf [file NIHPP2020.04.22.056127-supplement-1.pdf]

611 **Supplemental information:**

**Supplemental Figure 1**

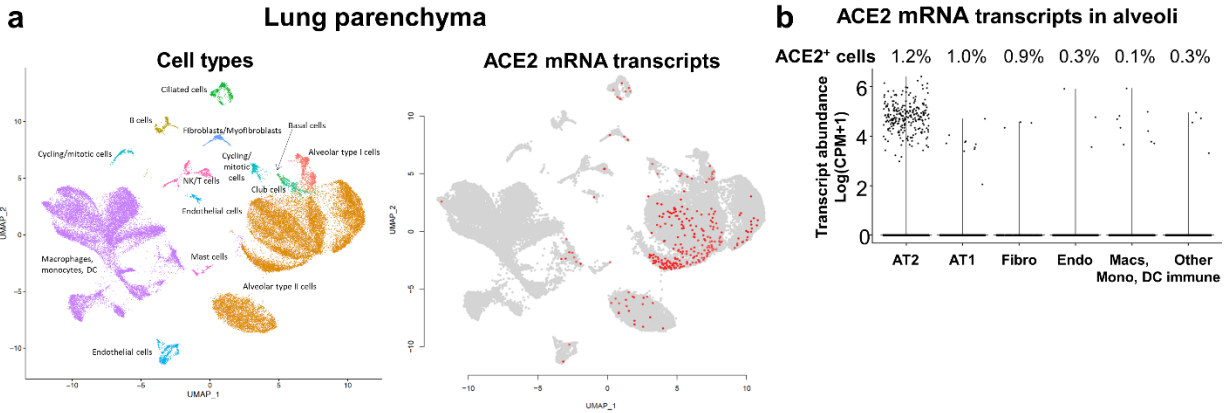

612

613 **Supplemental Figure 1.** Single-cell RNA sequencing reanalyses of ACE2 transcript abundance

614 in lung parenchyma (26). Summative observations from all donors. **a)** Uniform manifold

615 approximation and projection (UMAP) visualizations. Cells were clustered using a shared

616 nearest neighbor (SNN) approach. Cell types associated with each cluster were identified by

617 determining marker genes for each cluster. Each data point denotes a cell. On the right panel,

618 cells with ACE2 transcripts are shown in red. **b)** Violin plots representing ACE2 expression in

619 the alveoli. Airway cells (basal, mitotic, ciliated, club) are not shown. Percentage of ACE2<sup>+</sup> cells

620 within each cell type shows ACE2 transcripts in 1.2% of alveolar type II cells and in 0.1% of

621 macrophages, monocytes, or dendritic cells. Each data point denotes a cell, most cells have no

622 expression (0). AT2: alveolar type II. AT1: alveolar type I. Macs: Macrophages. Mono:

623 Monocytes. DC: dendritic cells. Other immune cells: B cells, mast cells, natural killer/T cells.

624 Endo: Endothelial. Fibro: Fibroblasts/myofibroblasts. NK: Natural killer. CPM: Counts per

625 million.

626

## Supplemental Figure 2

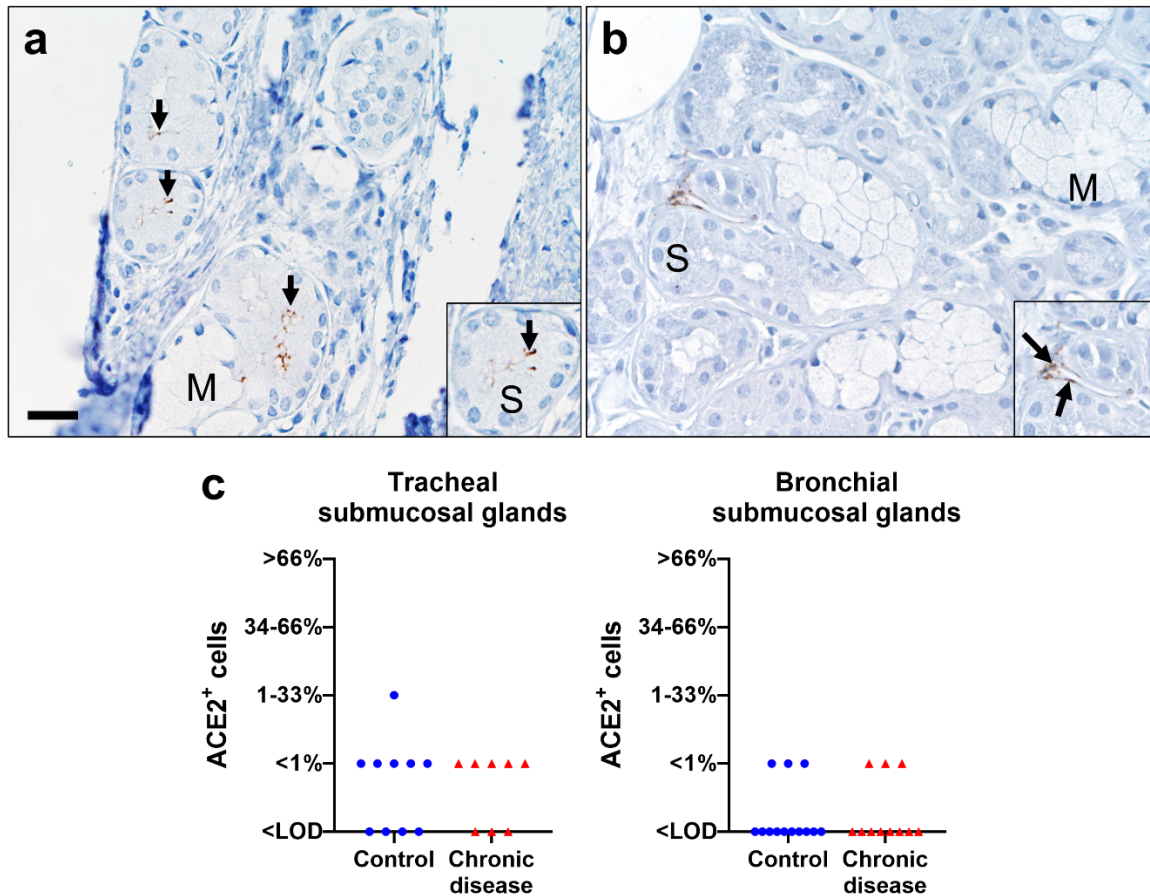

627

628 **Supplemental Figure 2.** Representative tissue section from submucosa of large airways

629 (trachea/bronchi) showing ACE2 protein localization (brown color, black arrows) (**a**, **b**) and

630 scores (**c**). **a**) Submucosal glands had uncommon to localized apical ACE2 protein (arrows) in

631 serous (S) cells, but not mucous (M) cells. **b**) Submucosal glands also had absent to uncommon

632 ACE2 protein (arrows) in the interstitium that centered on vascular walls and endothelium. This

633 vascular staining was uncommonly seen in lung too and corresponded to the low levels seen in

634 transcripts for these endothelial cells ([Supplemental Figure 1a-b](#)). Note the absence of ACE2

635 staining in serous (S) or mucous (M) cells of the gland (**b**). **c**) ACE2 protein scores for each

636 subject for serous cells in submucosal glands from trachea and bronchi, in control versus chronic

637 disease groups ( $P > 0.9999$ ,  $0.9999$ , respectively, Mann-Whitney U test). Bar = 25  $\mu\text{m}$ . LOD:

638 Limit of detection.

639

### Supplemental Figure 3

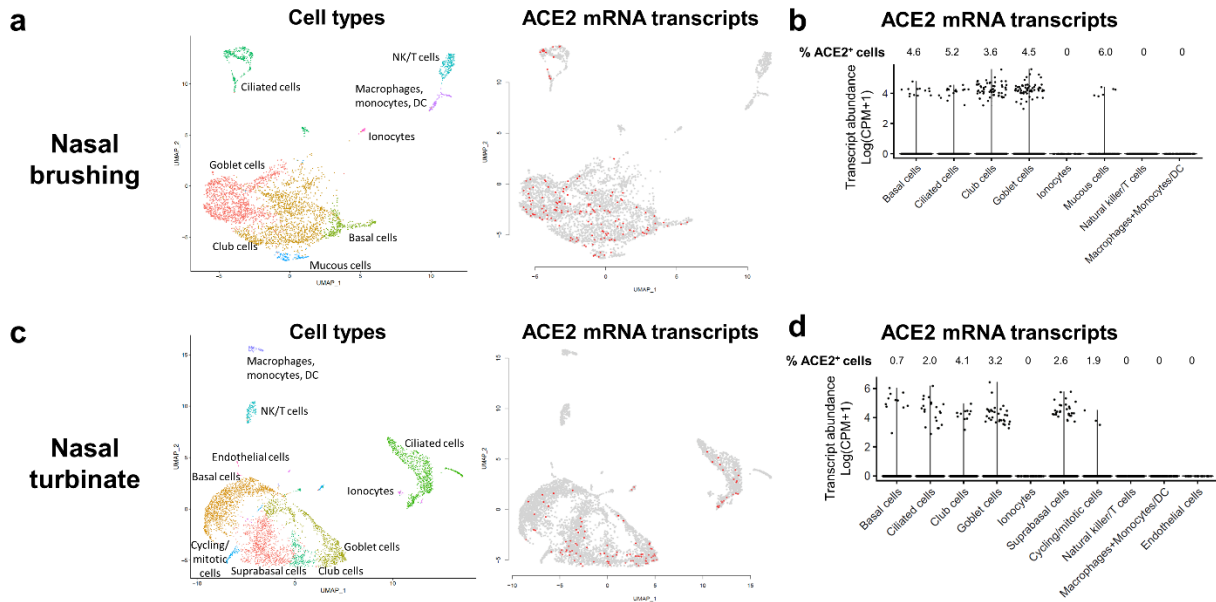

640

641 **Supplemental Figure 3.** Single-cell RNA sequencing reanalyses of ACE2 transcript abundance  
 642 in nasal brushing (**a, b**) and nasal turbinate (**c, d**) (27). **a, c**) Uniform manifold approximation  
 643 and projection (UMAP) visualizations. Cells were clustered using a shared nearest neighbor  
 644 (SNN) approach. Cell types associated with each cluster were identified by determining marker  
 645 genes for each cluster. Each data point denotes a cell. On the right panels, cells with ACE2  
 646 transcripts are shown in red. **b, d**) Violin plots representing ACE2 expression. In nasal turbinate  
 647 and nasal brushing, percentage of ACE2<sup>+</sup> cells within each cell type shows ACE2 expression on  
 648 epithelial cells. Each data point denotes a cell, most cells have no expression (0). DC: dendritic  
 649 cells. NK: Natural killer. CPM: Counts per million.

650

## Supplemental Figure 4

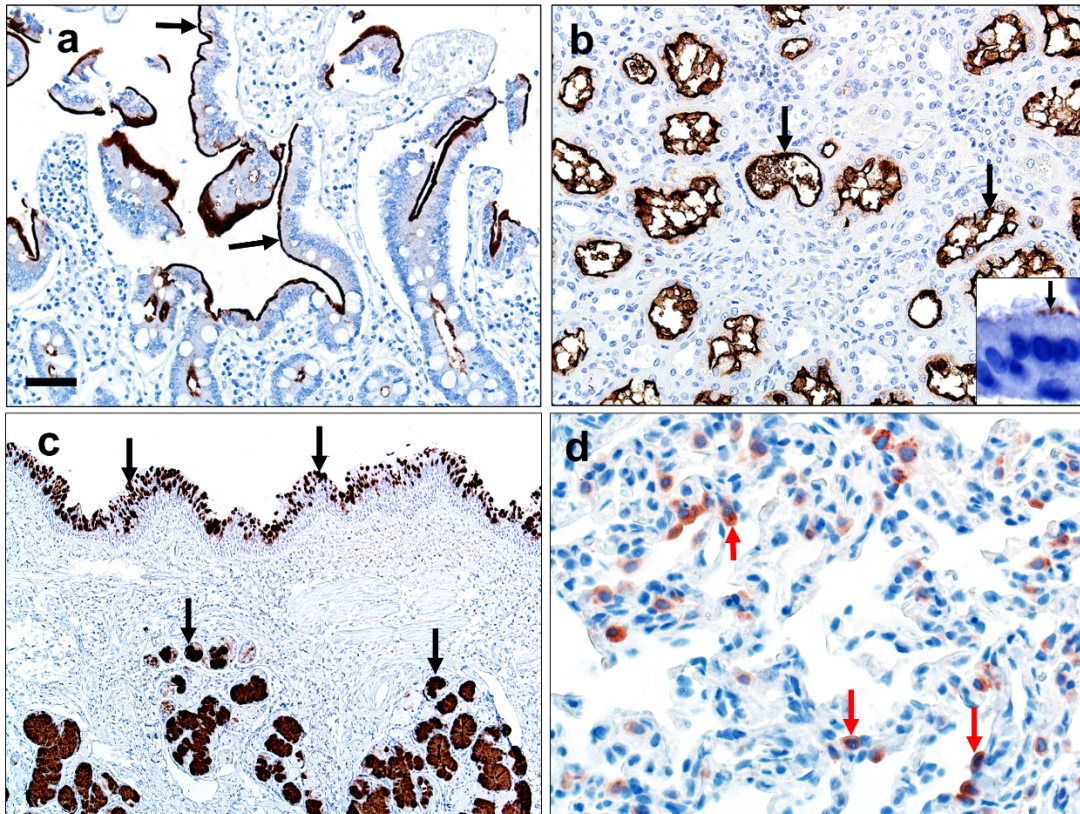

651

652 **Supplemental Figure 4.** Quality controls for ACE2 immunohistochemistry technique (**a, b**) and  
653 tissue quality (**c, d**). **a, b**) ACE2 protein (brown color, black arrows) was detected along the  
654 apical surface of small intestine enterocytes (**a**), renal tubule epithelium (**b**), and ciliated cells (**b**,  
655 **inset**) of primary airway cell cultures. These findings demonstrate specific detection of ACE2  
656 protein in cells/tissues consistent with known ACE2 expression. **c**) Representative  
657 immunostaining of bronchus detected abundant MUC5B protein (brown color, black arrows) in  
658 mucous cells of surface epithelium (top) and submucosal glands (bottom). **d**) Representative  
659 sections of alveoli had SP-C<sup>+</sup> alveolar type II cells (red color, red arrows). These results (**c, d**)  
660 demonstrate the tissues were intact and that immunostaining can be used to detect native airway  
661 (**c**) and lung (**d**) proteins. Bar = 40 (a, b), 80 (c), and 20  $\mu$ m (d).



666 **Supplemental Table 1. ACE2 protein reported in surface epithelium (SE) of human**  
 667 **respiratory tract surface epithelium.**

| Reported Cases [n]                                                 | Primary Ab | SN                                           | T           | B               | Br   | Al                         | Summary comments                                                                       |
|--------------------------------------------------------------------|------------|----------------------------------------------|-------------|-----------------|------|----------------------------|----------------------------------------------------------------------------------------|
| Non-diseased lungs / nasal [5 each]; diseased lungs [5] (20)       | Polyclonal | SE (C++, basal cells in squamous epithelium) | n.d.        | SE (C+)         | n.d. | AT1 (C++); AT2 (C++)       | Abundant ACE2 protein in lung epithelia                                                |
| Non-diseased lungs [5] (21)                                        | Undefined  | n.d.                                         | SE (C+, A+) | SE (C+, A+)     | n.d. | "Alveoli" (A+)<br>Mac (A+) | ACE2 is present on epithelia in several parts of the respiratory tract and macrophages |
| Lung [undefined] (22)                                              | Polyclonal | n.d.                                         | n.d.        | SE (C+, N+, M+) | n.d. | AT1-<br>AT2 (N+)           | ACE2 is present in bronchial epithelium, AT2 cells, and macrophages                    |
| Sinus [undefined] and Lung [undefined, same tissues as above] (23) | Polyclonal | SE (N++)                                     | SE (-)      | SE (C+, N++)    | n.d. | AT1-<br>AT2 (N++)          | ACE2 is present in sinus and bronchial epithelium, AT2 cells, and macrophages          |

668

669 Non-diseased: The cause of death was not directly related to lung disease

670 n.d.: Not described

671 Tissues: Sinonasal (SN), trachea (T), bronchi (B), bronchioles (Br), and alveoli (Al)

672 Cellular localization: cytoplasmic (C), nuclear (N), apical membrane (A)

673 Cells: Surface epithelium (SE), alveolar type I cells (AT1), alveolar type II cells (AT2), alveolar

674 macrophages (Mac)

675 ACE2 protein (based on published reports/figures): negative (-), weak (+), moderate to abundant

676 (++)

677 **Supplemental Table 2. Donor demographics and ACE2 distribution scores for each tissue**  
 678 **region.**

| Case # | Group           | Age (yrs) | Sex | Comorbidities                            | Trachea | Bronchi | Bronchioles | Alveoli |
|--------|-----------------|-----------|-----|------------------------------------------|---------|---------|-------------|---------|
| 1      | Control         | 5         | F   | Trauma                                   | NA      | 2       | 2           | 1       |
| 2      | Control         | 57        | M   | Arrhythmia                               | 0       | 0       | 0           | 1       |
| 3      | Control         | 31        | M   | Stroke (Joubert syndrome)                | 1       | 1       | 0           | 0       |
| 4      | Control         | 53        | F   | Trauma                                   | NA      | 0       | 0           | 1       |
| 5      | Control         | 2         | M   | Brain hemorrhage                         | 0       | 0       | 0           | 1       |
| 6      | Control         | 2         | M   | Trauma                                   | 0       | 0       | 1           | 2       |
| 7      | Control         | 0-5       | M   | Spinomuscular atrophy                    | NA      | 0       | 1           | 0       |
| 8      | Control         | 71        | M   | Stroke, Parkinson's disease, nonsmoker   | 0       | 1       | 1           | 0       |
| 9      | Control         | 4         | F   | Trauma                                   | 0       | 0       | 0           | 2       |
| 10     | Control         | 1-2       | M   | Trauma                                   | 0       | NA      | 1           | 1       |
| 11     | Control         | 53        | F   | Trauma, nonsmoker                        | 0       | 0       | 2           | 0       |
| 12     | Control         | 26        | F   | NA                                       | 0       | NA      | 0           | 0       |
| 13     | Control         | 27        | F   | NA                                       | NA      | 0       | 1           | 0       |
| 14     | Control         | 64        | M   | NA                                       | NA      | 1       | 1           | 0       |
| 15     | Chronic disease | 53        | F   | Smoker                                   | 0       | NA      | 0           | 1       |
| 16     | Chronic disease | 60        | M   | COPD, smoker                             | NA      | NA      | 0           | 1       |
| 17     | Chronic disease | 32        | M   | COPD, smoker                             | 0       | 0       | 0           | 1       |
| 18     | Chronic disease | 68        | M   | COPD                                     | NA      | 1       | 0           | 1       |
| 19     | Chronic disease | 68        | F   | COPD                                     | NA      | NA      | 1           | 1       |
| 20     | Chronic disease | 9         | M   | Asthma                                   | 0       | 0       | 0           | 1       |
| 21     | Chronic disease | 25        | F   | Cystic fibrosis                          | NA      | 0       | 0           | 0       |
| 22     | Chronic disease | 47        | F   | Cardiovascular disease                   | 1       | 2       | 2           | 1       |
| 23     | Chronic disease | 27        | M   | Cystic fibrosis                          | 0       | NA      | NA          | 1       |
| 24     | Chronic disease | 50        | F   | Cardiovascular disease, diabetes, asthma | NA      | 0       | 0           | 0       |
| 25     | Chronic disease | 37        | M   | Drug use, smoker                         | 0       | 0       | 0           | 0       |
| 26     | Chronic disease | 38        | M   | Asthma (status asthmaticus)              | 0       | 0       | 0           | 0       |
| 27     | Chronic disease | 32        | M   | Cystic fibrosis                          | NA      | NA      | 0           | 1       |
| 28     | Chronic disease | 58        | F   | Cardiovascular disease, diabetes, NASH   | 0       | 0       | 0           | 1       |
| 29     | Chronic disease | 19        | F   | Cystic fibrosis                          | NA      | 0       | 0           | 0       |

679

680 NA: Not available for analyses / COPD: Chronic obstructive pulmonary disease / NASH: Non-  
 681 alcoholic steatohepatitis.

682 Scoring: 0 = below limit of immunohistochemical detection; 1 = rare (<1%); 2 = 1-33%; 3 = 34-  
 683 66%; 4 = >66% of cells.

684



685 **Supplemental Table 3. Parameters for immunohistochemistry on fixed tissues.**

| Target                                 | Primary Antibody                                                                                                                                                               | Antigen Retrieval                                                                                                                | Secondary Reagents                                                                                                                                                                                                                                                                   |
|----------------------------------------|--------------------------------------------------------------------------------------------------------------------------------------------------------------------------------|----------------------------------------------------------------------------------------------------------------------------------|--------------------------------------------------------------------------------------------------------------------------------------------------------------------------------------------------------------------------------------------------------------------------------------|
| Angiotensin-Converting Enzyme 2 (ACE2) | Anti-ACE2, monoclonal (MAB933, R&D Systems, Minneapolis, MN USA) in diluent at 1:100 x 1 hour.                                                                                 | HIER, Citrate Buffer, pH 6.0, 110°C for 15 minutes; 20 min cool down (Decloaking Chamber Plus, Biocare Medical, Concord, CA USA) | Dako EnVision+ System-HRP Labeled Polymer Anti-mouse, 60 min (Dako North America, Inc., Carpinteria, CA USA), DAB Chromogen, counterstain.                                                                                                                                           |
| MUC5B                                  | Rabbit anti-MUC5B polyclonal, (LSBio #LS-B8121, LifeSpan BioSciences, Inc., Seattle, WA) in Dako Antibody Diluent (Dako North America, Inc., Carpinteria, CA); 1:60,000/30 min | HIER, Citrate buffer pH 6.0, 110°C for 15min; 20 min cool down                                                                   | Step 1: Biotinylated anti-Rabbit IgG (H+L) (Vector Laboratories, Inc., Burlingame, CA) in Dako Wash Buffer (Dako North America, Inc., Carpinteria, CA); 1:500, 30 min<br>Step 2: Vectastain ABC Kit (Vector Laboratories, Inc., Burlingame, CA), 30min. DAB Chromogen, counterstain. |
| Surfactant Protein – C (SP-C)          | Anti-SP-C, polyclonal (PA5-71680, Thermo Fisher Scientific, Waltham, MA USA) in diluent 1:100 x 1 hour                                                                         | HIER, Citrate Buffer, pH 6.0, 110°C for 15 minutes; 20 min cool down (Decloaking Chamber Plus, Biocare Medical, Concord, CA USA) | Dako EnVision+ System-HRP Labeled Polymer Anti-rabbit, 60 min (Dako North America, Inc., Carpinteria, CA USA), AEC chromogen, counterstain.                                                                                                                                          |

686

687 HIER – Heat-induced epitope retrieval

688 DAB – 3,3'-Diaminobenzidine (produces brown stain)

689 AEC - aminoethyl carbazole (produces red stain)

690 Counterstain – Harris hematoxylin (blue color)
